# Supplementary material
Source: PubMed Central journal article supplement (PMC4495215)
Supplement: AEM.01238-15_zam999116424so1.pdf [file AEM.01238-15_zam999116424so1.pdf]

1 Supplemental Information

2

3 **Microbial diversity in engineered haloalkaline environments shaped by shared geochemical**  
4 **drivers observed in natural analogues**

5 Talitha C. Santini<sup>1,2,3,#</sup>, Lesley A. Warren<sup>4</sup>, Kathryn E. Kendra<sup>4</sup>

6 <sup>1</sup> School of Geography, Planning, and Environmental Management, Steele Building, The  
7 University of Queensland, St Lucia QLD 4072

8 <sup>2</sup> Centre for Mined Land Rehabilitation, Sir James Foots Building, The University of  
9 Queensland, St Lucia QLD 4072

10 <sup>3</sup> School of Earth and Environment, The University of Western Australia, 35 Stirling Highway,  
11 Crawley WA 6009, Australia

12 <sup>4</sup> School of Geography and Earth Sciences, McMaster University, General Sciences Building,  
13 1280 Main Street West, Hamilton, Ontario, L8S4K1, Canada

14 # corresponding author: [t.santini@uq.edu.au](mailto:t.santini@uq.edu.au)

15

16 17 pages, 8 figures, 8 tables

17

18 (Note: Supplemental Information Tables S7-S9 are provided as separate .xls files for ease of use)

19 **Table S1.** Additional geochemical properties of bauxite residue samples.

| Sample name | Water extractable Ca (% wt) | Inorganic C (% wt) | Organic C (% wt) | Total N (% wt) | Exchangeable Ca (meq/100 g) | Exchangeable K (meq/100 g) | Exchangeable Mg (meq/100 g) | Exchangeable Na (meq/100 g) |
|-------------|-----------------------------|--------------------|------------------|----------------|-----------------------------|----------------------------|-----------------------------|-----------------------------|
| BR1         | 0.02                        | 20.9               | -                | -              | 2.00                        | 0.17                       | -                           | 14.83                       |
| BR2         | -                           | 4.19               | -                | -              | 3.95                        | 0.51                       | -                           | 25.99                       |
| BR3         | -                           | 0.99               | -                | -              | 8.04                        | -                          | -                           | 20.50                       |
| BR4         | 0.10                        | 0.77               | 4.68             | 0.2            | 6.15                        | 1.03                       | 5.16                        | 1.42                        |
| BR5         | -                           | 0.72               | 17.4             | 1              | -                           | 1.03                       | -                           | 71.13                       |
| BR6         | -                           | 0.04               | 0.24             | -              | 3.03                        | -                          | -                           | 0.08                        |
| BR7         | -                           | 0.48               | 0.09             | -              | 4.50                        | -                          | -                           | 0.86                        |
| BR8         | 0.03                        | 2.02               | 2.61             | -              | 10.74                       | -                          | 0.81                        | -                           |

20 - : below detection limit.

21 **Table S2.** Bacterial and fungal community diversity and richness in samples at phylum and OTU  
 22 level, and correlations between diversity and richness metrics.  
 23

| Sample name                        | Bacteria         |                  |      |                  |                  | Fungi            |                  |       |                  |
|------------------------------------|------------------|------------------|------|------------------|------------------|------------------|------------------|-------|------------------|
|                                    | H <sub>phy</sub> | H <sub>OTU</sub> | LOTU | S <sub>rar</sub> | L <sub>phy</sub> | H <sub>phy</sub> | H <sub>OTU</sub> | LOTU  | S <sub>rar</sub> |
| BR1                                | 1.28             | 4.68             | 0.98 | 215              |                  | -                | -                | -     | -                |
| BR2                                | 1.17             | 4.49             | 0.98 | 180              | 0.00             | 0.00             | 2.97             | 0.91  | 47               |
| BR3                                | 1.20             | 4.57             | 0.98 | 240              | 0.00             | 0.00             | 1.75             | 0.79  | 7                |
| BR4                                | 0.75             | 3.15             | 0.91 | 103              | -                | -                | -                | -     | -                |
| BR5                                | 1.16             | 5.31             | 0.99 | 522              | 0.41             | 0.79             | 4.14             | 0.96  | 95               |
| BR6                                | 1.66             | 6.33             | 1.00 | 750              | 0.09             | 0.22             | 4.65             | 0.98  | 126              |
| BR7                                | 1.65             | 6.70             | 1.00 | 1032             | 0.58             | 1.02             | 3.25             | 0.92  | 50               |
| BR8                                | 1.41             | 6.28             | 1.00 | 757              | 0.58             | 1.05             | 4.10             | 0.97  | 91               |
| Correlations<br>between<br>metrics | Bacteria         |                  |      |                  |                  | Fungi            |                  |       |                  |
|                                    | H <sub>phy</sub> | H <sub>OTU</sub> | LOTU | S <sub>rar</sub> | L <sub>phy</sub> | H <sub>phy</sub> | H <sub>OTU</sub> | LOTU  | S <sub>rar</sub> |
| L <sub>phy</sub>                   |                  |                  |      |                  |                  | 1.00***          |                  |       |                  |
| H <sub>OTU</sub>                   | 0.94***          |                  |      |                  | 0.41             | 0.47             |                  |       |                  |
| LOTU                               | 0.87**           | 0.85**           |      |                  | 0.50             | 0.55             | 0.97**           |       |                  |
| S <sub>rar</sub>                   | 0.83*            | 0.95***          | 0.64 |                  | 0.28             | 0.34             | 0.98***          | 0.91* |                  |

24

25

26 **Table S3.** Correlations between UniFrac principal component loadings, chemical and physical properties of bauxite residues, and  
 27 measures of bacterial community composition. Only statistically significant correlations are displayed. The relative abundances of  
 28 phyla and classes within the bacterial community of each sample were used to calculate correlations with principal components.  
 29

| Variable                                                         | PC1       | PC2      | PC3      | PC4       | PC5      | PC6 | PC7 |
|------------------------------------------------------------------|-----------|----------|----------|-----------|----------|-----|-----|
| <i>Chemical and physical properties</i>                          |           |          |          |           |          |     |     |
| EC                                                               | -0.8134*  |          |          |           |          |     |     |
| Exchangeable sodium percentage                                   |           |          |          |           | -0.7610* |     |     |
| pH                                                               |           |          |          |           | -0.7570* |     |     |
| Total alkalinity                                                 |           |          |          | -0.7933*  |          |     |     |
| Moisture content                                                 |           |          | -0.7798* |           |          |     |     |
| Water extractable Na                                             | -0.8420** |          |          |           |          |     |     |
| Gravel                                                           |           | 0.8635** |          |           |          |     |     |
| Sand                                                             | 0.7069*   |          |          |           |          |     |     |
| Silt                                                             | -0.8317*  |          |          |           |          |     |     |
| <i>Measures of bacterial community composition and diversity</i> |           |          |          |           |          |     |     |
| Clostridia                                                       |           |          |          | -0.8367** |          |     |     |
| Actinobacteria                                                   |           |          | 0.9184** |           |          |     |     |
| Bacteroidetes                                                    |           | 0.8743** |          |           |          |     |     |
| Epsilonproteobacteria                                            | -0.7069*  |          |          |           |          |     |     |
| Firmicutes                                                       | -0.7558*  |          |          |           |          |     |     |
| Gammaproteobacteria                                              |           |          |          | -0.8020*  |          |     |     |
| Gemmatimonadetes                                                 | 0.7274*   |          |          |           |          |     |     |
| Planctomycetes                                                   | 0.8142*   |          |          |           |          |     |     |
| Proteobacteria                                                   |           |          | -0.7764* |           |          |     |     |
| H' <sub>OTU</sub>                                                | 0.8426**  |          |          |           |          |     |     |
| S <sub>rar</sub>                                                 | 0.9027**  |          |          |           |          |     |     |

30

31 **Table S4.** Correlations between chemical and physical properties of bauxite residues, and measures of bacterial community  
 32 composition. Only statistically significant correlations are displayed. The relative abundances of phyla and classes within the bacterial  
 33 community of each sample were used to calculate correlations with chemical and physical properties.  
 34

| Variable                      | Clay     | EC        | Ex Na   | Gravel  | Inorganic C | Moisture content | Organic C | Total alkalinity | Sand      | Silt     | W Na      | pH        |
|-------------------------------|----------|-----------|---------|---------|-------------|------------------|-----------|------------------|-----------|----------|-----------|-----------|
| Alphaproteobacteria           | -0.7493* |           |         |         |             | 0.7454*          |           |                  |           |          |           | -0.8666** |
| Betaproteobacteria            | 0.8614** | 0.7171*   |         |         |             |                  |           |                  | -0.8275*  |          |           |           |
| Clostridia                    |          |           |         |         |             |                  |           | 0.9372***        |           |          |           |           |
| Deltaproteobacteria           | 0.7889*  | 0.7954*   |         |         | 0.8067*     |                  |           |                  | -0.7716*  |          | 0.7330*   |           |
| Epsilonproteobacteria         | 0.9019** | 0.9056**  |         |         | 0.7504*     |                  |           |                  | -0.8492** | 0.7871*  | 0.9075**  |           |
| Gammaproteobacteria           |          |           |         |         |             |                  | -0.7673*  |                  |           |          |           |           |
| Acidobacteria                 |          |           | 0.7707* |         |             |                  | 0.9146**  |                  |           |          |           |           |
| Actinobacteria                |          |           |         |         |             | -0.8411**        |           |                  |           |          |           |           |
| Bacteroidetes                 |          |           |         | 0.7750* |             |                  |           |                  |           |          |           |           |
| Chloroflexi                   |          |           |         |         |             |                  |           |                  |           | -0.7510* |           |           |
| Firmicutes                    | 0.7535*  | 0.7504*   |         |         |             |                  |           |                  |           | 0.7516*  | 0.7780*   |           |
| Gemmatimonadetes              |          |           |         |         |             |                  |           |                  |           |          |           |           |
| OP11                          | 0.8821** | 0.9370*** |         |         | 0.8184*     |                  |           |                  | -0.8313*  | 0.7757*  | 0.9333*** |           |
| Planctomycetes                |          |           |         |         |             |                  |           |                  |           |          |           |           |
| Proteobacteria                |          |           |         |         |             | 0.8413**         |           |                  |           |          |           | -0.7413*  |
| Verrucomicrobia               |          |           |         |         |             | 0.7109*          | 0.8553**  |                  |           |          |           |           |
| WS3                           | 0.8811** | 0.7551*   |         |         |             |                  |           |                  | -0.8133*  | 0.7454*  | 0.7785*   |           |
| H' <sub>phy</sub>             |          |           |         |         |             | -0.7122*         |           |                  |           |          |           |           |
| 35 Ex Na: exchangeable Na     |          |           |         |         |             |                  |           |                  |           |          |           |           |
| 36 W Na: water extractable Na |          |           |         |         |             |                  |           |                  |           |          |           |           |

37 **Table S5.** Correlations between UniFrac principal component loadings, chemical and physical properties of bauxite residues, and  
 38 measures of fungal community composition. Only statistically significant correlations are displayed. The relative abundances of phyla  
 39 and classes within the fungal community of each sample were used to calculate correlations with principal components.  
 40

| Variable                                                      | PC1        | PC2      | PC3 | PC4        | PC5 |
|---------------------------------------------------------------|------------|----------|-----|------------|-----|
| <i>Chemical and physical properties</i>                       |            |          |     |            |     |
| Total alkalinity                                              | 0.9535**   |          |     |            |     |
| Gravel content (%)                                            |            | -0.8365* |     |            |     |
| Moisture content (%)                                          |            |          |     | -0.9875*** |     |
| Exchangeable Na                                               |            |          |     | -0.9063*   |     |
| Organic C (%)                                                 |            |          |     | -0.8392*   |     |
| <i>Measures of fungal community composition and diversity</i> |            |          |     |            |     |
| H <sup>o</sup> <sub>OTU</sub>                                 | -0.9172*   |          |     |            |     |
| L <sub>OTU</sub>                                              | -0.9749*** |          |     |            |     |
| S <sub>rar</sub>                                              | -0.8350*   |          |     |            |     |
| Dothideomycetes                                               | 0.8448*    |          |     |            |     |
| Cryptomycota                                                  |            |          |     | -0.8561*   |     |
| Dacrymycetes                                                  |            |          |     | -0.8534    |     |

41

42 **Table S6.** Correlations between chemical and physical properties of bauxite residues, and measures of fungal community  
 43 composition. Only statistically significant correlations are displayed. The relative abundances of phyla and classes within the fungal  
 44 community of each sample were used to calculate correlations with chemical and physical properties.  
 45

|                   | Asco      | Basi | Chyt | Crypt | Dacry | Dothi    | Glom   | Sord   | Total alkalinity | Moisture content | Ex Na | Organic C | pH |
|-------------------|-----------|------|------|-------|-------|----------|--------|--------|------------------|------------------|-------|-----------|----|
| Asco              |           |      |      |       |       |          |        |        |                  |                  |       |           |    |
| Basi              |           |      |      |       |       |          |        |        |                  |                  |       |           |    |
| Chyt              |           |      |      |       |       |          |        |        |                  |                  |       |           |    |
| Crypt             |           |      |      |       |       |          |        |        |                  |                  |       |           |    |
| Dacry             |           |      |      |       |       |          |        |        |                  |                  |       |           |    |
| Dothi             |           |      |      |       |       |          |        |        |                  |                  |       |           |    |
| Glom              |           |      |      |       |       |          |        |        |                  |                  |       |           |    |
| Sord              |           |      |      |       |       |          |        |        |                  |                  |       |           |    |
| H' <sub>phy</sub> | -0.977*** |      |      |       |       | -0.936** |        | 0.895* |                  |                  |       |           |    |
| H' <sub>OTU</sub> |           |      |      |       |       |          |        |        | -0.850*          |                  |       |           |    |
| L <sub>phy</sub>  | -0.989*** |      |      |       |       | -0.922** | 0.838* |        |                  |                  |       |           |    |
| LOTU              |           |      |      |       |       |          |        |        | -0.950**         |                  |       |           |    |

46 Asco: Ascomycota; Basi: Basidiomycota; Chyt: Chytridiomycota; Crypt: Cryptomycetes; Dacry: Dacrymycetes; Dothi:  
 47 Dothideomycetes; Glom: Glomeromycota; Sord: Sordariomycetes; Ex Na: Exchangeable Na.  
 48

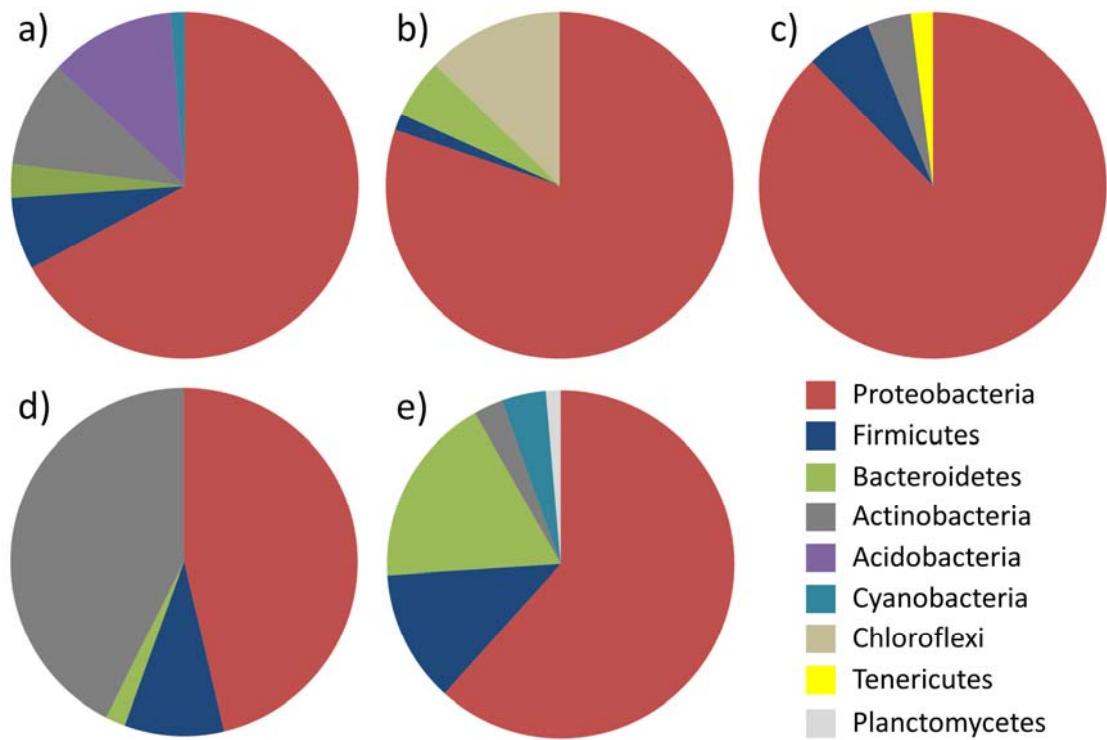

49

50 **Figure S1.** Relative abundance of bacterial phyla as percentage of total sequence reads in  
 51 current study ((a): bauxite residue, (b) oil sands tailings) and previous studies ((c):  
 52 chromite ore processing residue; (1), (d) uranium mill tailings; (2), (e) Tirez lagoon; (3).  
 53 Note that steel slag (4) was not included here as all OTUs belonged to the Proteobacteria,  
 54 and that Kenyan soda lake (5) sequences were not included as they failed to match any  
 55 reference sequences during closed reference OTU picking. Phyla representing < 1 % of  
 56 sequences per environment type are not displayed.  
 57



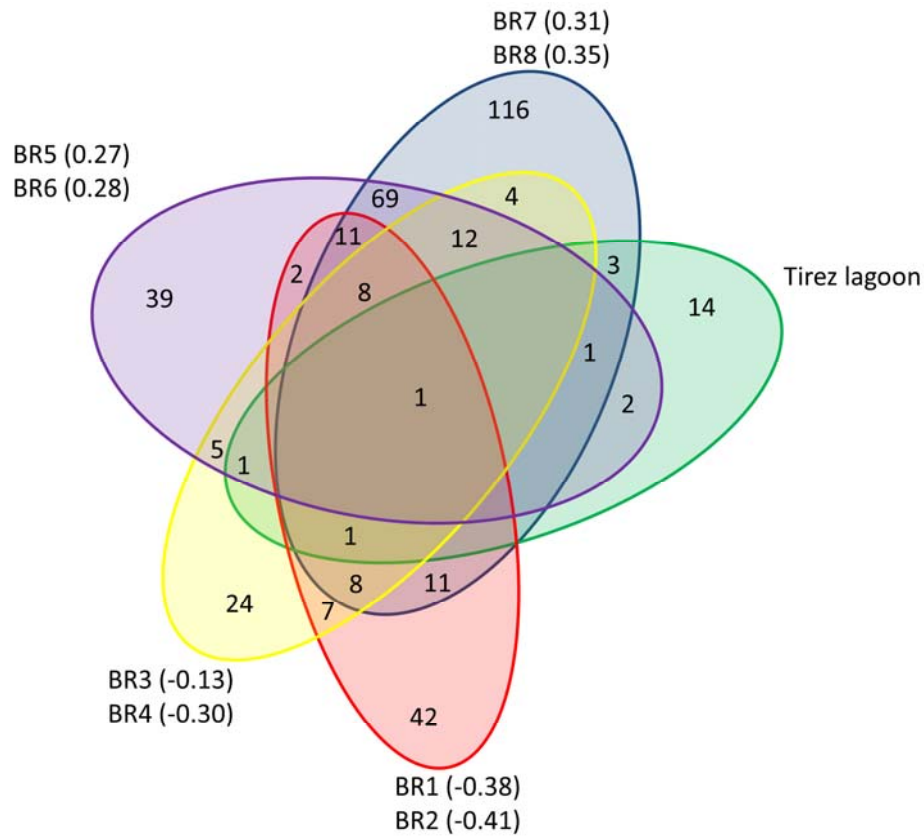

58  
59  
60  
61  
62  
63  
64

**Figure S2.** Shared OTUs between bacterial communities in clusters of bauxite residue samples (as identified by UniFrac cluster environments tool) and Tirez lagoon. Each bauxite residue cluster is labelled with the names of samples for which bacterial OTUs were pooled during data analysis, and their PC1 score. Blank regions indicate no shared OTUs.

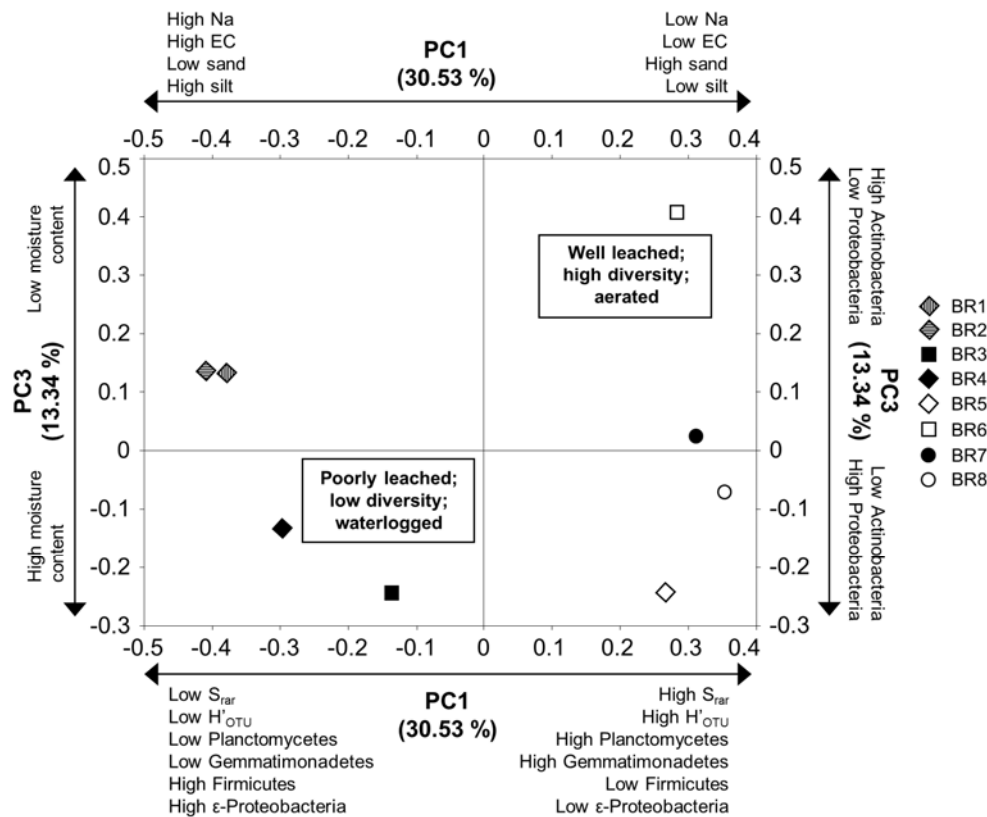

65

66 **Figure S3.** Bacterial community compositions as a function of their loading on principal  
 67 components 1 (PC1) and 3 (PC3), as determined by UniFrac. Legend refers to samples  
 68 identified in Table 1. Axis labels refer to principal components (PCs) and the total  
 69 proportion of variance explained by each component (%). Double headed arrows and  
 70 labels next to the top X axis and left Y axis identify significant correlations between  
 71 principal components and environmental variables. Double headed arrows and labels  
 72 next to the bottom X axis and right Y axis identify significant correlations between principal  
 73 components and bacterial community composition and diversity variables. Bold text in  
 74 boxes within graphs identifies inferred environmental characteristics associated with high  
 75 and low loadings on each combination of principal components.  
 76

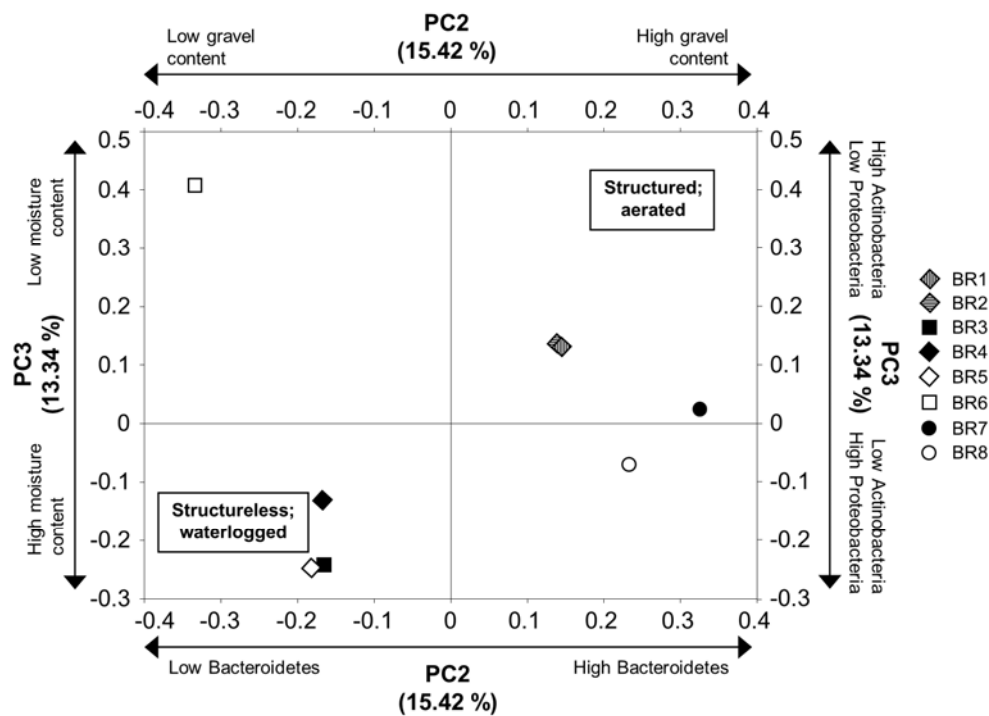

77

78 **Figure S4.** Bacterial community compositions as a function of their loading on principal  
 79 components 2 (PC2) and 3 (PC3), as determined by UniFrac. Legend refers to samples  
 80 identified in Table 1. Axis labels refer to principal components (PCs) and the total  
 81 proportion of variance explained by each component (%). Double headed arrows and  
 82 labels next to the top X axis and left Y axis identify significant correlations between  
 83 principal components and environmental variables. Double headed arrows and labels next  
 84 to the bottom X axis and right Y axis identify significant correlations between principal  
 85 components and bacterial community composition and diversity variables. Bold text in  
 86 boxes within graphs identifies inferred environmental characteristics associated with high  
 87 and low loadings on each combination of principal components.  
 88

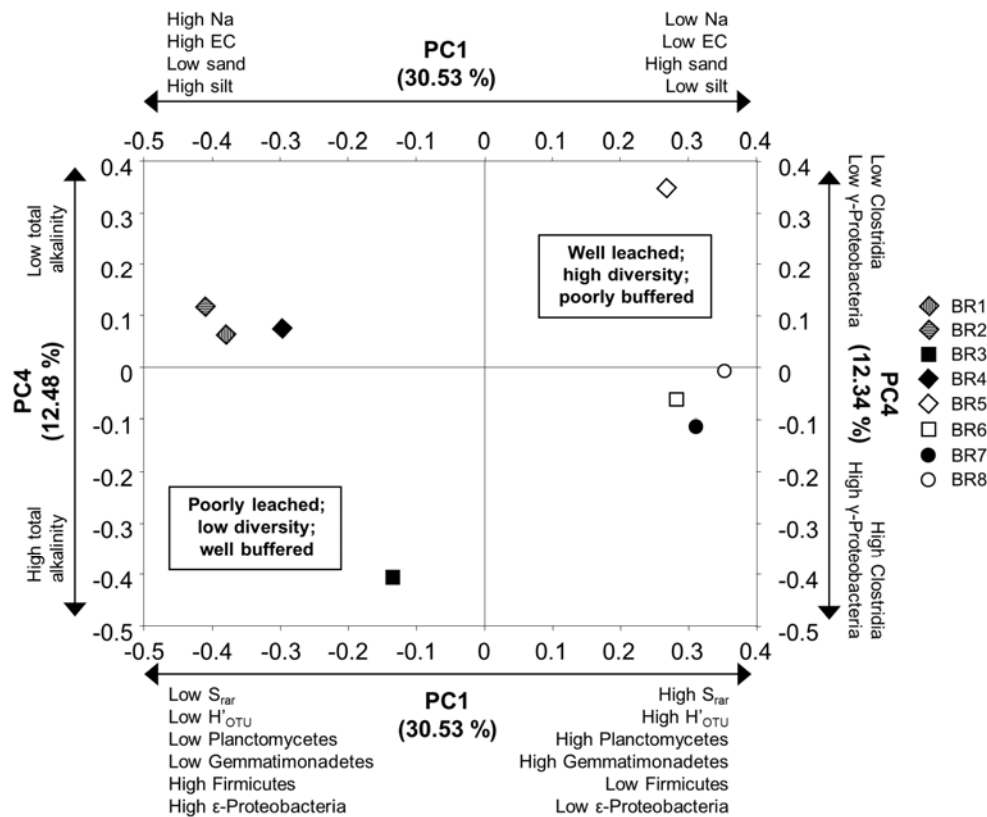

89

90 **Figure S5.** Bacterial community compositions as a function of their loading on principal  
 91 components 1 (PC1) and 4 (PC4), as determined by UniFrac. Legend refers to samples  
 92 identified in Table 1. Axis labels refer to principal components (PCs) and the total  
 93 proportion of variance explained by each component (%). Double headed arrows and  
 94 labels next to the top X axis and left Y axis identify significant correlations between  
 95 principal components and environmental variables. Double headed arrows and labels next  
 96 to the bottom X axis and right Y axis identify significant correlations between principal  
 97 components and bacterial community composition and diversity variables. Bold text in  
 98 boxes within graphs identifies inferred environmental characteristics associated with high  
 99 and low loadings on each combination of principal components.

100

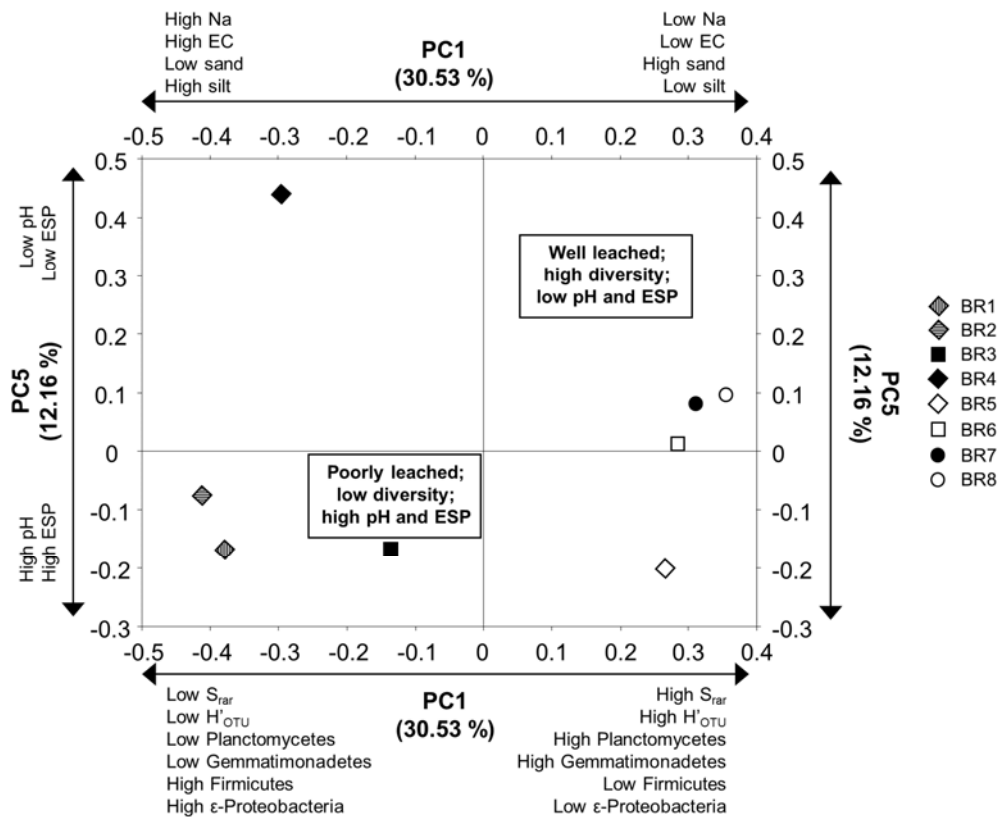

101

102 **Figure S6.** Bacterial community compositions as a function of their loading on principal  
 103 components 1 (PC1) and 5 (PC5), as determined by UniFrac. Legend refers to samples  
 104 identified in Table 1. Axis labels refer to principal components (PCs) and the total  
 105 proportion of variance explained by each component (%). Double headed arrows and  
 106 labels next to the top X axis and left Y axis identify significant correlations between  
 107 principal components and environmental variables. Double headed arrows and labels next  
 108 to the bottom X axis and right Y axis identify significant correlations between principal  
 109 components and bacterial community composition and diversity variables. Bold text in  
 110 boxes within graphs identifies inferred environmental characteristics associated with high  
 111 and low loadings on each combination of principal components.  
 112

113 **Table S10.** Loadings on principal components for each bacterial community sample  
 114 analysed, and percentage of total variance explained by each principal component, as  
 115 determined by the UniFrac tool.  
 116

| Sample                        | Principal component |        |        |        |        |        |        |
|-------------------------------|---------------------|--------|--------|--------|--------|--------|--------|
|                               | 1                   | 2      | 3      | 4      | 5      | 6      | 7      |
| BR1                           | -0.378              | 0.146  | 0.130  | 0.061  | -0.172 | -0.014 | 0.264  |
| BR2                           | -0.409              | 0.140  | 0.134  | 0.114  | -0.082 | -0.038 | -0.267 |
| BR3                           | -0.134              | -0.164 | -0.245 | -0.407 | -0.169 | -0.018 | -0.029 |
| BR4                           | -0.295              | -0.165 | -0.133 | 0.072  | 0.439  | 0.042  | 0.039  |
| BR5                           | 0.267               | -0.181 | -0.246 | 0.345  | -0.204 | 0.084  | -0.005 |
| BR6                           | 0.283               | -0.333 | 0.408  | -0.064 | 0.012  | -0.016 | -0.002 |
| BR7                           | 0.313               | 0.325  | 0.024  | -0.113 | 0.080  | 0.339  | -0.012 |
| BR8                           | 0.354               | 0.233  | -0.071 | -0.008 | 0.096  | -0.381 | 0.011  |
| Total variation explained (%) | 30.53               | 15.42  | 13.34  | 12.48  | 12.16  | 10.49  | 5.56   |

117

118 **Table S11.** Loadings on principal components for each fungal community sample  
 119 analysed, and percentage of total variance explained by each principal component, as  
 120 determined by the UniFrac tool.  
 121

| Sample                        | Principal component |        |        |        |        |
|-------------------------------|---------------------|--------|--------|--------|--------|
|                               | 1                   | 2      | 3      | 4      | 5      |
| BR1                           | -                   | -      | -      | -      | -      |
| BR2                           | 0.102               | -0.341 | -0.366 | -0.008 | 0.010  |
| BR3                           | 0.665               | 0.130  | 0.116  | 0.000  | 0.016  |
| BR4                           | -                   | -      | -      | -      | -      |
| BR5                           | -0.204              | 0.217  | -0.059 | -0.355 | -0.008 |
| BR6                           | -0.195              | 0.309  | -0.154 | 0.273  | -0.078 |
| BR7                           | -0.149              | -0.228 | 0.278  | 0.015  | -0.232 |
| BR8                           | -0.218              | -0.087 | 0.185  | 0.075  | 0.292  |
| Total variation explained (%) | 38.21               | 21.25  | 18.17  | 13.11  | 9.25   |

122

123

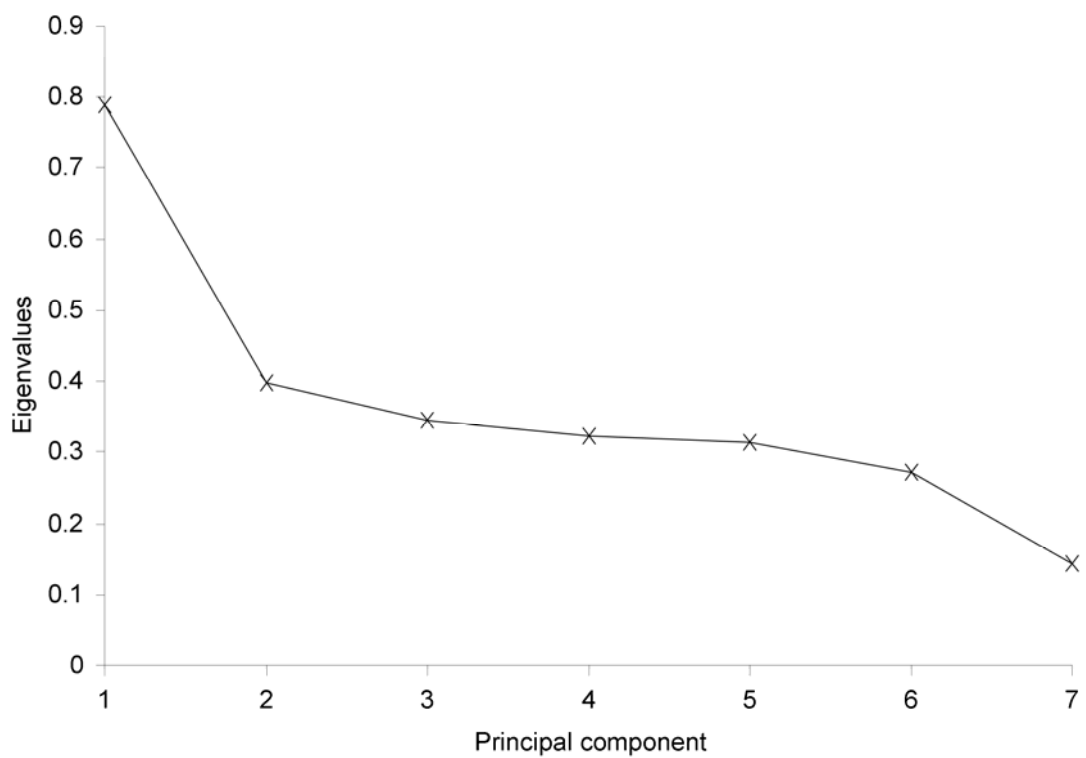

124

125 **Figure S7.** Scree plot illustrating eigenvalues for each principal component identified in  
126 the analysis of bacterial communities within bauxite residue samples with the UniFrac  
127 tool.  
128



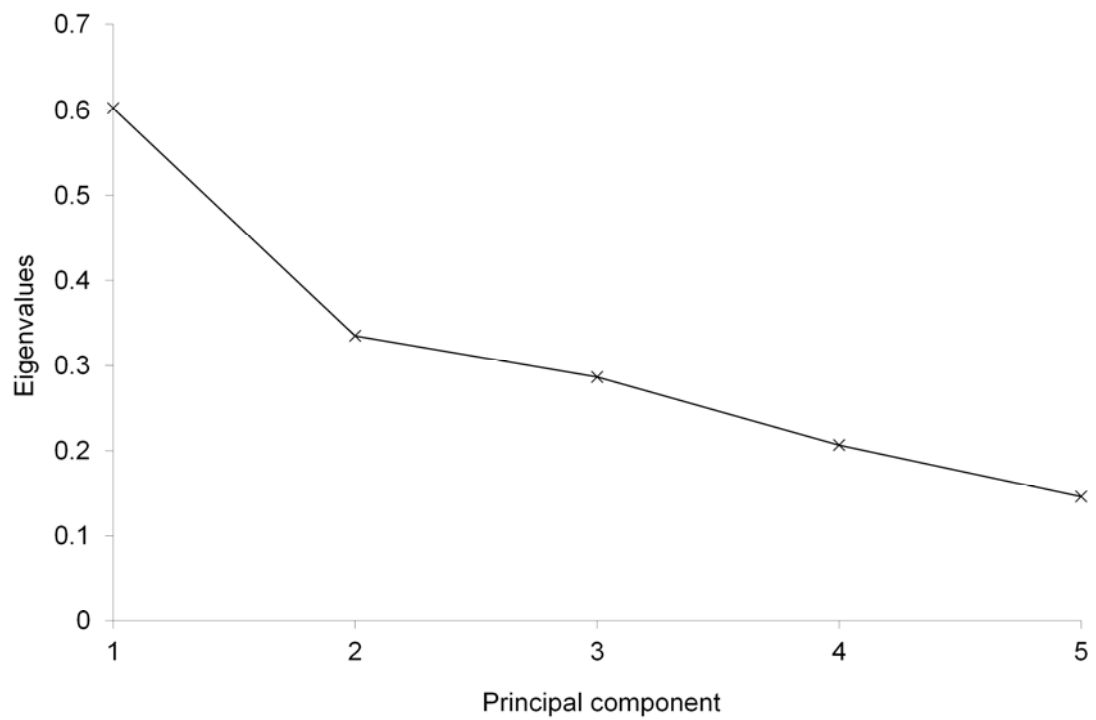

129

130 **Figure S8.** Scree plot illustrating eigenvalues for each principal component identified in  
131 the analysis of fungal communities within bauxite residue samples with the UniFrac tool.  
132

133 References

- 134 1. **Brito EMS, Piñón-Castillo HA, Guyoneaud R, Caretta CA, Gutiérrez-Corona JF,**  
135 **Duran R, Reyna-López GE, Nevárez-Moorillón GV, Fahy A, Goñi-Urriza M.** 2013.  
136 Bacterial biodiversity from anthropogenic extreme environments: a hyper-alkaline and  
137 hyper-saline industrial residue contaminated by chromium and iron. *Appl Microbiol*  
138 *Biotechnol* **97**:369-378.
- 139 2. **Bondici VF, Lawrence JR, Khan NH, Hill JE, Yergeau E, Wolfaardt GM,**  
140 **Warner J, Korber DR.** 2013. Microbial communities in low permeability, high pH  
141 uranium mine tailings: characterisation and potential effects. *J Appl Microbiol* **114**:1671-  
142 1686.
- 143 3. **Montoya L, Vizioli C, Rodríguez N, Rastoll MJ, Amils R, Marin I.** 2013. Microbial  
144 community composition of Tirez lagoon (Spain), a highly sulphated athalassohaline  
145 environment. *Aquat Biosyst* **9**:19.
- 146 4. **Roadcap GS, Sanford RA, Jin Q, Pardinás JR, Bethke CM.** 2006. Extremely  
147 alkaline (pH>12) groundwater hosts diverse microbial community. *Groundwater* **44**:511-  
148 517.
- 149 5. **Rees HC, Grant WD, Jones BE, Heaphy S.** 2004. Diversity of Kenyan soda lake  
150 alkaliphiles assessed by molecular methods. *Extremophiles* **8**:63-71.
